# Supplementary material
Source: PubMed Central journal article supplement (PMC3523678)
Supplement: NIHMS405290-supplement-Supplementary_information_file.pdf [file NIHMS405290-supplement-Supplementary_information_file.pdf]

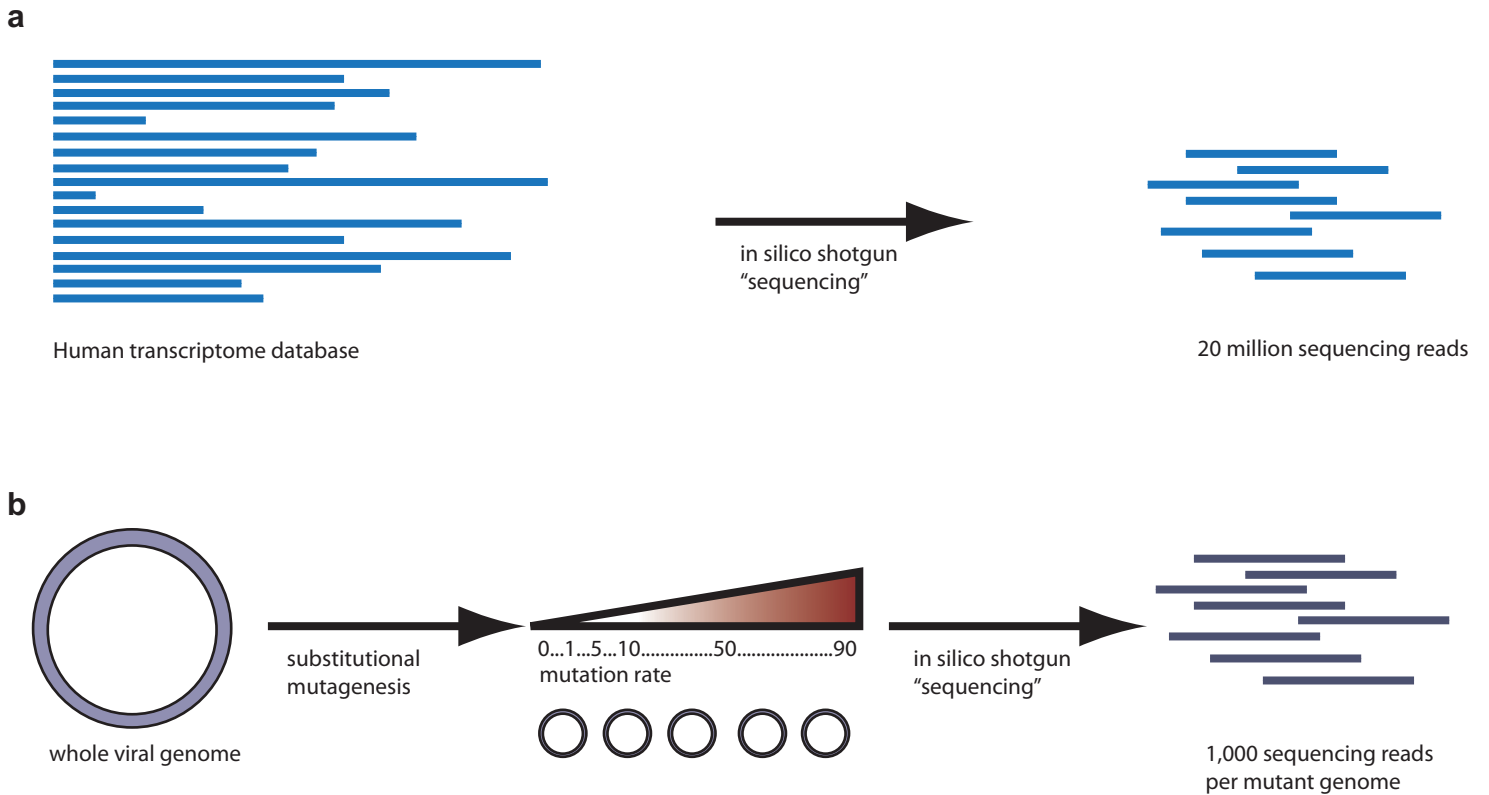

**Supplementary Figure 1. Generation of artificial shotgun sequencing reads.** (a) 20 million reads were generated from a human transcriptome database by randomly selecting 100-mer sequences. (b) A set of twelve virus genomes were selected (see **Methods**). For each genome, substitutional mutations were introduced at twelve distinct mutation rates, and for each of these mutated genomes 100-mer sequences were chosen at random to produce the read set.

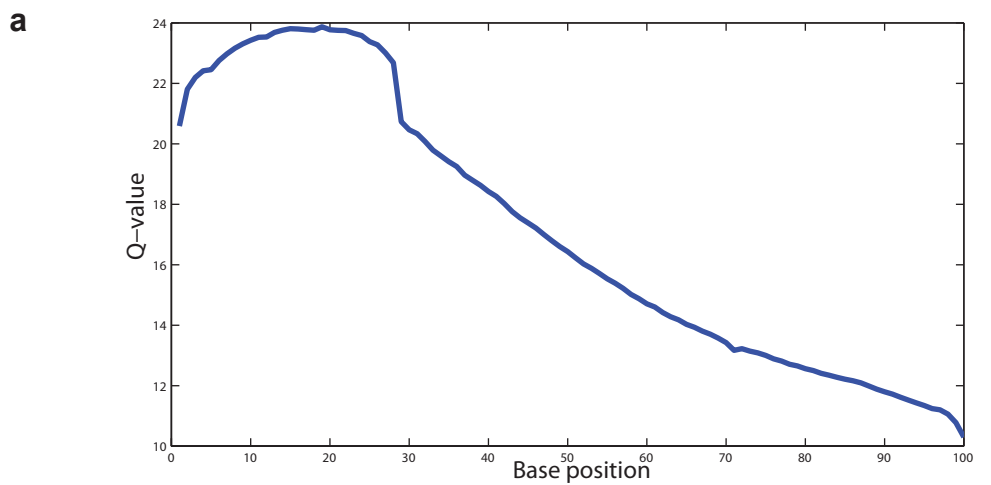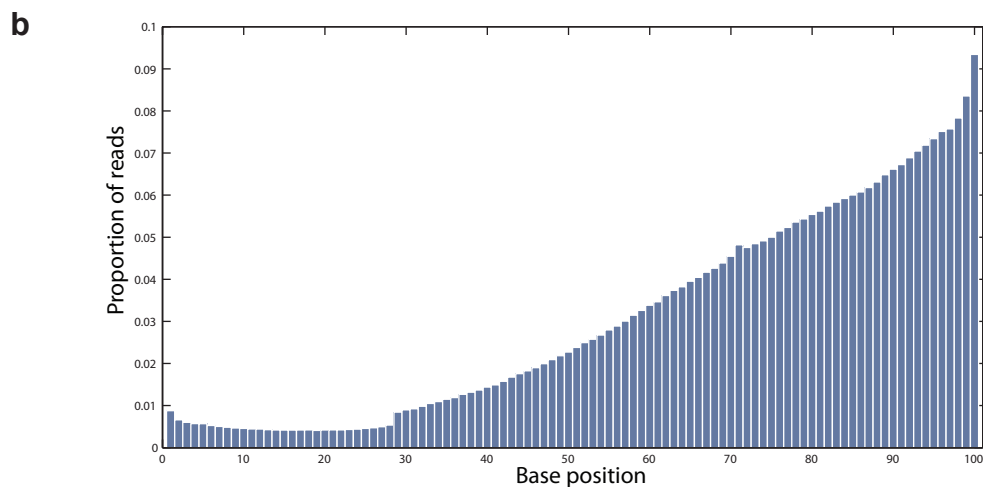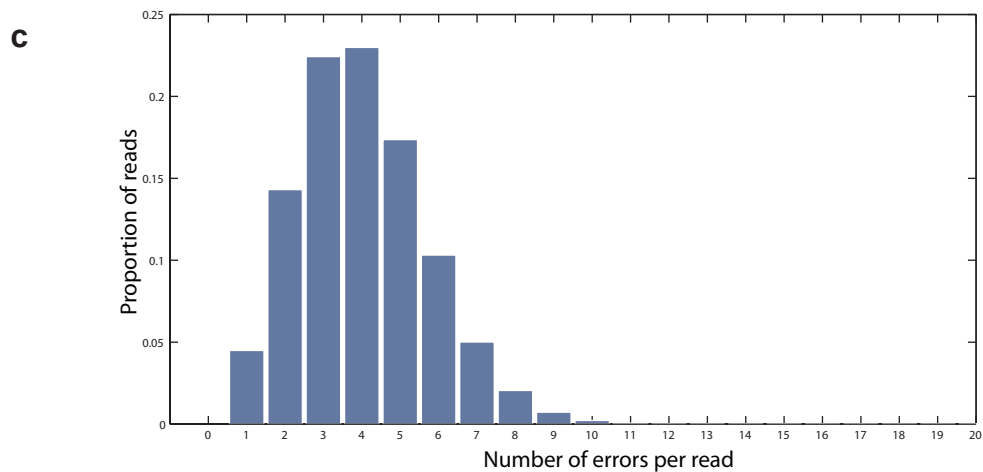

**Supplementary Figure 2. Applying a sequencing error distribution model to artificially generated reads.** (a) Average quality score plot for a typical set of reads generated by the Illumina GAII Sequencer. The Q-value is defined as  $Q = -10 \cdot \log_{10}(p/(1-p))$ , where  $p$  is the probability that the corresponding base call is incorrect. (b) The error distribution was applied to the complete set of reads generated as shown in **Supplementary Figure 1**. The plot shows the proportion of the read set containing a substituted base at the indicated position. (c) The proportion of the read set is shown as a function of the number of sequencing errors per read.

**a**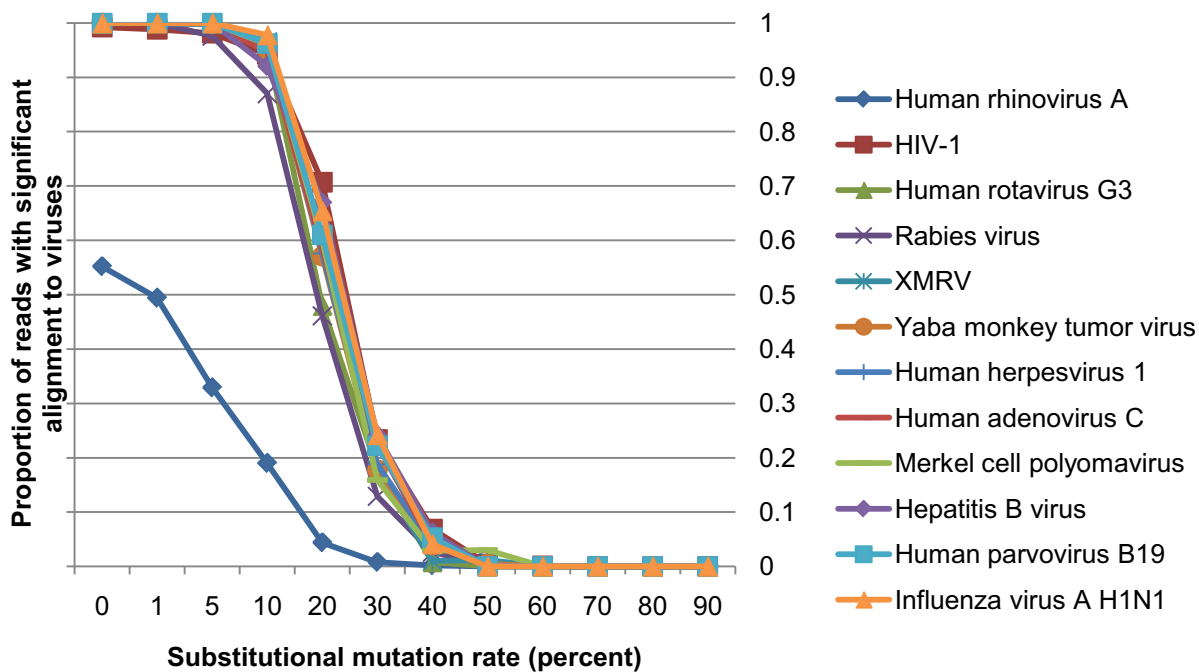**b**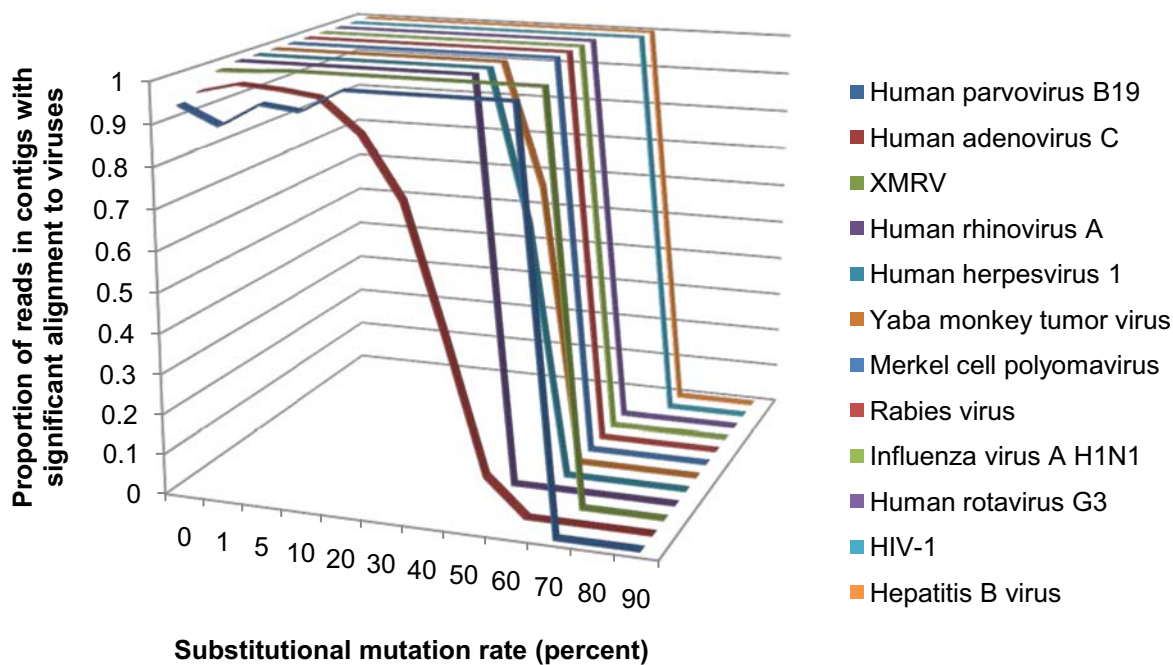

**Supplementary Figure 3. Identification of virus-derived reads by sequence similarity.** (a) Reads were generated as indicated in **Supplementary Figure 1b**. The proportion of reads identified as a virus sequence (MegaBlast alignment, E-value < 10e-10) is shown as a function of the substitutional mutation rate of the mutated genome. (b) Independent assemblies were performed on all reads from each of the 144 genomes. The proportion of reads incorporated into contigs that were identified as a virus sequence (MegaBlast alignment, E-value < 10e-10) is shown.

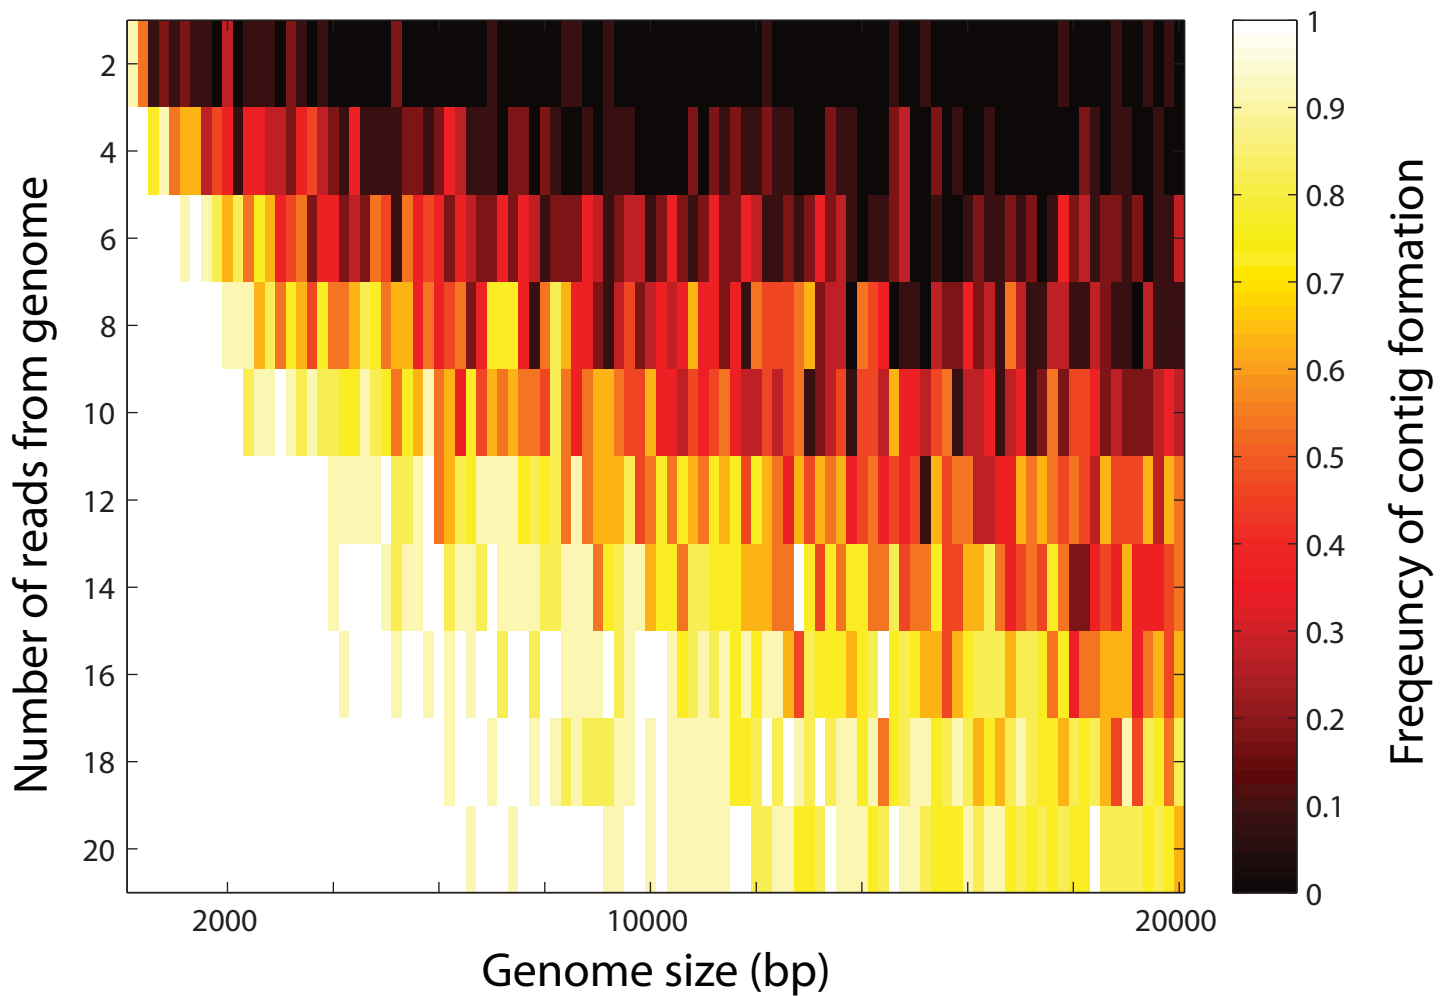

**Supplementary Figure 4. Probability of contig formation for sequences randomly generated from a genome of varying size.** This figure shows the probability of forming contigs from a set of simulated, virus-derived reads. Reads were generated by selecting random 100-mers from a series of genomes ranging in size from 100bp to 20,000bp, producing between 2 and 20 reads per genome. The heatmap indicates the frequency among 11 replicates with which a contig of at least 175bp was formed from these reads by *de novo* assembly.

**Supplementary Table 1. Bacterial genomes used to construct an artificial sequence dataset to test the metagenomics module of PathSeq.** Shown is the set of bacterial genomes that were each used to create a set of 10,000 random 100-mers. The species were chosen to represent both evolutionary relatedness and divergence to test the ability of the metagenomics module to properly assess the microbial representation of a mixed sample.

| Accession   | Definition                                                       |
|-------------|------------------------------------------------------------------|
| NC_003228.3 | <i>Bacteroides fragilis</i> NCTC 9343, complete genome.          |
| NC_009614.1 | <i>Bacteroides vulgatus</i> ATCC 8482, complete genome.          |
| NC_013316.1 | <i>Clostridium difficile</i> R20291, complete genome.            |
| NC_009615.1 | <i>Parabacteroides distasonis</i> ATCC 8503, complete genome.    |
| NC_004663.1 | <i>Bacteroides thetaiotaomicron</i> VPI-5482, complete genome.   |
| NC_010816.1 | <i>Bifidobacterium longum</i> DJO10A, complete genome.           |
| NC_008618.1 | <i>Bifidobacterium adolescentis</i> ATCC 15703, complete genome. |
| NC_012781.1 | <i>Eubacterium rectale</i> ATCC 33656, complete genome.          |
| NC_012778.1 | <i>Eubacterium eligens</i> ATCC 27750, complete genome.          |
| NC_010655.1 | <i>Akkermansia muciniphila</i> ATCC BAA-835, complete genome.    |
| NC_011353.1 | <i>Escherichia coli</i> O157:H7 str. EC4115, complete genome.    |
| NC_004668.1 | <i>Enterococcus faecalis</i> V583, complete genome.              |

**Supplementary Table 2. Metagenomic analysis on a sequence dataset constructed from a set of twelve bacterial genomes.** Shown is the number of reads that were identified as matching to the indicated bacterial genome (actual number of reads is 10,000 for each species).

| Genus           | Species           | Number of Reads | Fraction Genome Coverage |
|-----------------|-------------------|-----------------|--------------------------|
| Bifidobacterium | adolescentis      | 9877            | 0.376091154              |
| Eubacterium     | eligens           | 9903            | 0.368491132              |
| Bifidobacterium | longum            | 9933            | 0.333497209              |
| Akkermansia     | muciniphila       | 9954            | 0.310035802              |
| Enterococcus    | faecalis          | 9900            | 0.264391797              |
| Eubacterium     | rectale           | 9953            | 0.249987753              |
| Clostridium     | difficile         | 9829            | 0.208571056              |
| Parabacteroides | distasonis        | 9929            | 0.186090932              |
| Bacteroides     | vulgatus          | 9943            | 0.173829585              |
| Bacteroides     | fragilis          | 9929            | 0.169107843              |
| Bacteroides     | thetaitotaomicron | 9933            | 0.146473822              |
| Escherichia     | coli              | 5133            | 0.089648584              |
| Staphylococcus  | aureus            | 3               | 1.04E-04                 |
| Bifidobacterium | dentium           | 1               | 3.79E-05                 |
| Shigella        | dysenteriae       | 1               | 2.29E-05                 |
| Shigella        | sonnei            | 1               | 2.07E-05                 |

**Supplementary Table 3. PathSeq performance on artificially generated sequence data.** Reads were generated by sampling random 100-mer sequences from a human transcriptome database, generating 20 million reads, or from a set of twelve virus genomes each substitutionally mutated at twelve distinct rates, generating 144,000 reads. The rows represent the number of reads remaining at each step in the PathSeq workflow.

| Stage in workflow    | Human reads remaining | Virus reads remaining | Virus reads subtracted at each step |
|----------------------|-----------------------|-----------------------|-------------------------------------|
| START                | 20000000              | 144000                |                                     |
| Duplicate Remover    | 19633552              | 144000                | 0                                   |
| Maq database1        | 5441980               | 144000                | 0                                   |
| Maq database2        | 696074                | 144000                | 0                                   |
| Maq database3        | 1218                  | 144000                | 0                                   |
| Maq database4        | 1213                  | 144000                | 0                                   |
| RepeatMasker Remover | 853                   | 142880                | 1120                                |
| MegaBlast database1  | 0                     | 142878                | 2                                   |
| MegaBlast database2  | 0                     | 142878                | 0                                   |
| Blast database1      | 0                     | 142878                | 0                                   |
| Blast database2      | 0                     | 142878                | 0                                   |

**Supplementary Table 4. PathSeq performance on artificially generated sequence data with introduced sequencing errors.** Reads are the same as in Table 1 except that “sequence errors” were introduced into the reads according to a sequencing error distribution model.

| Stage in workflow    | Human reads remaining | Virus reads remaining | Virus reads subtracted at each step |
|----------------------|-----------------------|-----------------------|-------------------------------------|
| START                | 20000000              | 144000                |                                     |
| Duplicate Remover    | 19999188              | 144000                | 0                                   |
| Maq database1        | 14240412              | 144000                | 0                                   |
| Maq database2        | 12205718              | 144000                | 0                                   |
| Maq database3        | 11745641              | 144000                | 0                                   |
| Maq database4        | 11744303              | 144000                | 0                                   |
| RepeatMasker Remover | 11149237              | 143071                | 929                                 |
| MegaBlast database1  | 54343                 | 143070                | 1                                   |
| MegaBlast database2  | 54329                 | 143070                | 0                                   |
| Blast database1      | 0                     | 143069                | 1                                   |
| Blast database2      | 0                     | 143069                | 0                                   |

## SUPPLEMENTARY METHODS

**Modifications made to the Illumina RNA-Seq Protocol.** Total RNA (500 ng) was heated at 98°C for 100 min in THE RNA Storage Solution (1 mM sodium citrate, pH 6.4; Ambion/ABI, AM7000) to fragment the RNA to a mean size of ~500 nucleotides. Quality of RNA fragmentations was assessed on a Bioanalyzer 2100 (Agilent). First-strand cDNA synthesis was performed by adding random hexamers (Invitrogen, 48190-011) to the RNA and heating at 70°C for 10 min, and then immediately incubating at 50 °C for 1 h upon addition of Superscript III reverse transcriptase (Invitrogen). Second-strand synthesis was carried-out with *E. coli* DNA ligase and *E. coli* DNA polymerase I (Invitrogen) for 2.5 h at 16 °C. cDNA was purified using the MiniElute PCR Purification Kit (Qiagen) and evaluated using Bioanalyzer. End-repair, addition of adenine to the 3' end of the DNA fragments, and adapter ligation was performed as described in Guttman *et al.*, except a 2:1 molar ratio of adapter to DNA fragment was used during adapter-ligation. The resulting adapter-ligated fragments were purified on a 4% SeaKem LE agarose gel (Lonza) and a 400-500 base pair band was cut out of the gel and purified using the MiniElute kit. PCR was performed with Phusion DNA polymerase (Finnzymes) and adapter-specific primers using the following conditions: 2 min at 98 °C; [10 s at 98 °C, 30 s at 65 °C, 30 s at 72 °C] for 13 cycles; 5 min at 72 °C. Following PCR, a second round of gel extraction was performed as described above, and the product was submitted for Illumina sequencing.

**PathSeq runtime and performance.** PathSeq analysis was performed using a cluster of 19 worker nodes and 1 master node, which were EC2 Large CPU instances (7GB of memory and 2 processor cores). Full analysis of HeLa cell RNA-Seq data described in this report was



performed in approximately 13 hours (wall clock time) for a total price of \$89 USD. The CPU time for this analysis was approximately 270 hours. Actual runtime and cost may vary depending on congestion on the Amazon EC2, Internet traffic, and the method of data upload. Because of its parallel architecture, PathSeq can analyze substantially larger datasets in a similar timeframe simply by increasing the cluster size.

**Metagenomic analysis.** The metagenomic analysis module of PathSeq reports the relative abundance of bacteria and archaea. This analysis begins with a MegaBlast alignment of the readset against the complete set of fully sequenced bacterial and archaeal genomes (<ftp://ftp.ncbi.nih.gov/genomes/Bacteria/>, downloaded 2010-03-30), reporting all hits with >90% sequence identity and >90% query coverage. The top 30 hits for each read are reported. Using these alignment results, classifications of each read are attempted at the phylum, then genus, then species level. If a given read cannot be classified uniquely at a given classification level (i.e. it has multiple hits to different reference sequences with equivalent E-values), then it is considered ambiguous and discarded from analysis at that level. Using species-level classifications, the fraction-genome-coverage is calculated for each species that received a hit, and this metric is used to quantify the relative abundance of a given species, normalized by the genome size.

**Introduction of “sequencing errors” into simulated sequence data.** Sequencing errors were introduced into the simulated reads based on quality scores seen in a whole-genome sequence dataset of a glioblastoma multiforme (GBM) primary tumor (sequenced as part of The Cancer Genome Atlas; data available via the NCBI Short Read Archive (SRA) identifier SRX010704). The average quality score for each base along the length of the reads was calculated across the

dataset and offset by -5 (**Supplementary Fig. 3a**). This was converted into a probability value and used to “mutate” our simulated reads (i.e. for a sequence error probability of 0.001, there is a 0.1% chance that the base will be converted to a different base).

**Human whole-genome ovarian tumor sequencing data.** The human ovarian tumor whole-genome sequencing dataset was sequenced as part of The Cancer Genome Atlas, and the data is available via the NCBI SRA identifier SRX010747. This is a 101 base pair, paired-end sequence dataset with a nominal fragment length of 264 base pairs.

**Supplementary Data Set 1. Microbial sequences identified among the unmapped clone end sequences from *Wheeler et al.*** We performed a MegaBlast alignment of all contigs against bacterial, viral, and fungal nucleotide databases. The most significant alignments are reported.

| Query name           | Query length | BLAST Database | Hit ID                       | Bit score | E-value   |
|----------------------|--------------|----------------|------------------------------|-----------|-----------|
| contig freeze2_11177 | 914          | Bacteria       | gi 191636824 ref NC_010999.1 | 1431.17   | 0         |
| contig freeze2_11275 | 999          | Bacteria       | gi 191636824 ref NC_010999.1 | 1594.6    | 0         |
| contig freeze2_10679 | 1167         | Bacteria       | gi 191636824 ref NC_010999.1 | 2057.96   | 0         |
| contig freeze2_30701 | 816          | Bacteria       | gi 198282148 ref NC_011206.1 | 712.082   | 0         |
| contig freeze2_31723 | 737          | Bacteria       | gi 198282148 ref NC_011206.1 | 533.272   | 8.09E-149 |
| contig freeze2_14303 | 866          | Bacteria       | gi 91774356 ref NC_007947.1  | 838.979   | 0         |
| contig freeze2_10972 | 976          | Bacteria       | gi 116493574 ref NC_008526.1 | 1636.89   | 0         |
| contig freeze2_11051 | 1117         | Bacteria       | gi 116493574 ref NC_008526.1 | 1792.63   | 0         |
| contig freeze2_30191 | 850          | Bacteria       | gi 198282148 ref NC_011206.1 | 658.247   | 0         |
| contig freeze2_10883 | 1429         | Bacteria       | gi 191636824 ref NC_010999.1 | 2400.2    | 0         |
| contig freeze2_10866 | 1012         | Bacteria       | gi 116493574 ref NC_008526.1 | 1461.93   | 0         |
| contig freeze2_10893 | 1018         | Bacteria       | gi 191636824 ref NC_010999.1 | 1236.98   | 0         |
| contig freeze2_10847 | 1718         | Bacteria       | gi 191636824 ref NC_010999.1 | 2798.2    | 0         |
| contig freeze2_29354 | 953          | Bacteria       | gi 198282148 ref NC_011206.1 | 633.252   | 8.43E-179 |
| contig freeze2_10443 | 1376         | Bacteria       | gi 191636824 ref NC_010999.1 | 2223.31   | 0         |
| contig freeze2_10302 | 1610         | Bacteria       | gi 116493574 ref NC_008526.1 | 2342.52   | 0         |
| contig freeze2_10881 | 859          | Bacteria       | gi 258506995 ref NC_013198.1 | 1286.97   | 0         |
| contig freeze2_10536 | 1560         | Bacteria       | gi 191636824 ref NC_010999.1 | 2384.82   | 0         |
| contig freeze2_10792 | 1135         | Bacteria       | gi 191636824 ref NC_010999.1 | 1658.04   | 0         |
| contig freeze2_10806 | 1223         | Bacteria       | gi 191636824 ref NC_010999.1 | 1909.92   | 0         |
| contig freeze2_11056 | 1045         | Bacteria       | gi 116493574 ref NC_008526.1 | 1542.68   | 0         |
| contig freeze2_10841 | 1408         | Bacteria       | gi 191636824 ref NC_010999.1 | 1992.59   | 0         |
| contig freeze2_18067 | 798          | Bacteria       | gi 190572091 ref NC_010943.1 | 783.221   | 0         |
| contig freeze2_10478 | 938          | Bacteria       | gi 191636824 ref NC_010999.1 | 863.974   | 0         |
| contig freeze2_12874 | 596          | Fungi          | gi 162949218 ref NC_001139.8 | 346.771   | 4.33E-93  |
| contig freeze2_12205 | 809          | Fungi          | gi 162949218 ref NC_001139.8 | 419.833   | 6.02E-115 |
| contig freeze2_12696 | 727          | Fungi          | gi 162949218 ref NC_001139.8 | 398.684   | 1.26E-108 |

**Supplementary Data Set 2. Microbial sequences identified among the novel sequences from the Asian and African genomes from *Li et al.*** The set of novel sequences from the Asian and African genome were downloaded (<http://yh.genomics.org.cn/download.jsp#pd>) and aligned by MegaBlast against bacterial, viral and fungal nucleotide databases. The most significant alignments are reported.

| Query name                 | Query length | BLAST Database | Hit ID                       | Bit score | E-value |
|----------------------------|--------------|----------------|------------------------------|-----------|---------|
| C119303880_1_334.0:1-332   | 332          | Viruses        | gi 82503188 ref NC_007605.1  | 639.02    | 0       |
| C119524968_1_364.0:1-362   | 362          | Viruses        | gi 82503188 ref NC_007605.1  | 696.7     | 0       |
| C119600616_1_375.0:1-373   | 373          | Viruses        | gi 82503188 ref NC_007605.1  | 717.85    | 0       |
| C119674423_1_386.0:1-384   | 384          | Viruses        | gi 82503188 ref NC_007605.1  | 739       | 0       |
| C119705567_1_391.0:1-389   | 389          | Viruses        | gi 139424470 ref NC_009334.1 | 748.613   | 0       |
| C119726695_1_395.0:1-393   | 393          | Viruses        | gi 139424470 ref NC_009334.1 | 756.304   | 0       |
| C119731793_1_395.0:1-393   | 393          | Viruses        | gi 82503188 ref NC_007605.1  | 756.304   | 0       |
| C119744189_1_397.0:1-395   | 395          | Viruses        | gi 82503188 ref NC_007605.1  | 760.149   | 0       |
| C119748653_1_398.0:1-396   | 396          | Viruses        | gi 139424470 ref NC_009334.1 | 762.072   | 0       |
| C119896026_1_423.0:1-421   | 421          | Viruses        | gi 82503188 ref NC_007605.1  | 806.294   | 0       |
| C119902298_1_424.0:41-422  | 382          | Viruses        | gi 82503188 ref NC_007605.1  | 735.154   | 0       |
| C119921199_1_427.0:1-425   | 425          | Viruses        | gi 82503188 ref NC_007605.1  | 817.83    | 0       |
| C119940413_1_431.0:1-429   | 429          | Viruses        | gi 139424470 ref NC_009334.1 | 825.521   | 0       |
| C120002643_1_442.0:1-440   | 440          | Viruses        | gi 139424470 ref NC_009334.1 | 846.67    | 0       |
| C120149024_1_469.0:1-467   | 467          | Viruses        | gi 82503188 ref NC_007605.1  | 898.583   | 0       |
| C120191480_1_478.0:1-476   | 476          | Viruses        | gi 139424470 ref NC_009334.1 | 915.887   | 0       |
| C120258135_1_491.0:1-489   | 489          | Viruses        | gi 82503188 ref NC_007605.1  | 940.882   | 0       |
| C120330447_1_507.0:1-505   | 505          | Viruses        | gi 82503188 ref NC_007605.1  | 971.645   | 0       |
| C120346593_1_510.0:1-508   | 508          | Viruses        | gi 82503188 ref NC_007605.1  | 977.413   | 0       |
| C120492119_1_544.0:1-542   | 542          | Viruses        | gi 139424470 ref NC_009334.1 | 719.773   | 0       |
| C120522603_1_551.0:1-549   | 549          | Viruses        | gi 139424470 ref NC_009334.1 | 1056.24   | 0       |
| C120531769_1_554.0:1-552   | 552          | Viruses        | gi 139424470 ref NC_009334.1 | 1040.86   | 0       |
| C120703811_1_598.0:1-596   | 596          | Viruses        | gi 82503188 ref NC_007605.1  | 1135.07   | 0       |
| C120935232_1_665.0:1-663   | 663          | Viruses        | gi 82503188 ref NC_007605.1  | 1275.43   | 0       |
| C120951592_1_671.0:1-669   | 669          | Viruses        | gi 139424470 ref NC_009334.1 | 1254.28   | 0       |
| C120960358_1_673.0:1-671   | 671          | Viruses        | gi 82503188 ref NC_007605.1  | 1290.81   | 0       |
| C121286040_1_791.0:1-789   | 789          | Viruses        | gi 82503188 ref NC_007605.1  | 1517.69   | 0       |
| C121288274_1_792.0:1-790   | 790          | Viruses        | gi 82503188 ref NC_007605.1  | 1506.15   | 0       |
| C121293122_1_794.0:1-792   | 792          | Viruses        | gi 82503188 ref NC_007605.1  | 1517.69   | 0       |
| C121319800_1_805.0:1-803   | 803          | Viruses        | gi 82503188 ref NC_007605.1  | 1544.61   | 0       |
| C121320126_1_805.0:1-803   | 803          | Viruses        | gi 82503188 ref NC_007605.1  | 1544.61   | 0       |
| C121347810_1_817.0:1-815   | 815          | Viruses        | gi 139424470 ref NC_009334.1 | 1554.22   | 0       |
| C121428246_1_852.0:1-850   | 850          | Viruses        | gi 82503188 ref NC_007605.1  | 1634.97   | 0       |
| C121453377_1_864.0:1-862   | 862          | Viruses        | gi 82503188 ref NC_007605.1  | 1171.6    | 0       |
| C121497526_1_885.0:1-883   | 883          | Viruses        | gi 82503188 ref NC_007605.1  | 1698.42   | 0       |
| C121554558_1_914.0:1-912   | 912          | Viruses        | gi 82503188 ref NC_007605.1  | 1738.8    | 0       |
| C121571538_1_923.0:1-921   | 921          | Viruses        | gi 82503188 ref NC_007605.1  | 1769.56   | 0       |
| C121651310_1_966.0:1-964   | 964          | Viruses        | gi 82503188 ref NC_007605.1  | 1854.16   | 0       |
| C121664332_1_973.0:1-971   | 971          | Viruses        | gi 82503188 ref NC_007605.1  | 1867.62   | 0       |
| C121768448_1_1036.0:1-1034 | 1034         | Viruses        | gi 82503188 ref NC_007605.1  | 1988.75   | 0       |

|                               |      |         |                              |         |   |
|-------------------------------|------|---------|------------------------------|---------|---|
| C121866248_1_1102.0:1-1100    | 1100 | Viruses | gi 82503188 ref NC_007605.1  | 2115.64 | 0 |
| C121868598_1_1104.0:1-1102    | 1102 | Viruses | gi 82503188 ref NC_007605.1  | 2119.49 | 0 |
| C121889809_1_1119.0:1-1117    | 1117 | Viruses | gi 82503188 ref NC_007605.1  | 2148.33 | 0 |
| C121895511_1_1123.0:1-1121    | 1121 | Viruses | gi 82503188 ref NC_007605.1  | 2156.02 | 0 |
| C121913385_1_1137.0:1-1135    | 1135 | Viruses | gi 82503188 ref NC_007605.1  | 2182.94 | 0 |
| C121922687_1_1144.0:1-1142    | 1142 | Viruses | gi 82503188 ref NC_007605.1  | 2192.55 | 0 |
| C121941707_1_1158.0:1-1156    | 1156 | Viruses | gi 82503188 ref NC_007605.1  | 2207.93 | 0 |
| C122032117_1_1233.0:1-1231    | 1231 | Viruses | gi 139424470 ref NC_009334.1 | 2352.13 | 0 |
| C122181441_1_1381.0:1-1379    | 1379 | Viruses | gi 139424470 ref NC_009334.1 | 2652.07 | 0 |
| C122299164_1_1526.0:1-1524    | 1524 | Viruses | gi 82503188 ref NC_007605.1  | 2930.86 | 0 |
| C122328330_1_1567.0:1-1565    | 1565 | Viruses | gi 82503188 ref NC_007605.1  | 3009.69 | 0 |
| C122330180_1_1570.0:1-1568    | 1568 | Viruses | gi 82503188 ref NC_007605.1  | 3015.46 | 0 |
| C122362574_1_1620.0:1-1618    | 1618 | Viruses | gi 82503188 ref NC_007605.1  | 3111.6  | 0 |
| C122435276_1_1745.0:1-1743    | 1743 | Viruses | gi 82503188 ref NC_007605.1  | 3351.93 | 0 |
| C122441380_1_1757.0:1-1755    | 1755 | Viruses | gi 82503188 ref NC_007605.1  | 3375    | 0 |
| C122442982_1_1760.0:1-1758    | 1758 | Viruses | gi 82503188 ref NC_007605.1  | 3380.77 | 0 |
| C122455201_1_1784.0:1-1782    | 1782 | Viruses | gi 82503188 ref NC_007605.1  | 3178.89 | 0 |
| C122458643_1_1791.0:1-1789    | 1789 | Viruses | gi 82503188 ref NC_007605.1  | 3440.38 | 0 |
| C122460615_1_1795.0:1-1793    | 1793 | Viruses | gi 82503188 ref NC_007605.1  | 3448.07 | 0 |
| C122480117_1_1836.0:1-1834    | 1834 | Viruses | gi 82503188 ref NC_007605.1  | 3526.9  | 0 |
| C122499557_1_1880.0:1-1878    | 1878 | Viruses | gi 82503188 ref NC_007605.1  | 3611.5  | 0 |
| C122500603_1_1882.0:1-1880    | 1880 | Viruses | gi 82503188 ref NC_007605.1  | 3615.34 | 0 |
| C122532157_1_1960.0:1-1958    | 1958 | Viruses | gi 82503188 ref NC_007605.1  | 3765.31 | 0 |
| C122536387_1_1970.0:1-1968    | 1968 | Viruses | gi 82503188 ref NC_007605.1  | 3782.61 | 0 |
| C122640872_1_2310.0:1-2308    | 2308 | Viruses | gi 82503188 ref NC_007605.1  | 4438.25 | 0 |
| C122682056_1_2501.0:1-2499    | 2499 | Viruses | gi 82503188 ref NC_007605.1  | 4805.48 | 0 |
| C122683436_1_2508.0:1-2506    | 2506 | Viruses | gi 82503188 ref NC_007605.1  | 4818.94 | 0 |
| C122691220_1_2551.0:1-2549    | 2549 | Viruses | gi 82503188 ref NC_007605.1  | 4892.01 | 0 |
| C122698812_1_2596.0:1-2594    | 2594 | Viruses | gi 82503188 ref NC_007605.1  | 4988.14 | 0 |
| C122715178_1_2699.0:1-2697    | 2697 | Viruses | gi 82503188 ref NC_007605.1  | 5186.18 | 0 |
| C122720738_1_2737.0:1-2735    | 2735 | Viruses | gi 82503188 ref NC_007605.1  | 5259.24 | 0 |
| C122742268_1_2909.0:1-2907    | 2907 | Viruses | gi 82503188 ref NC_007605.1  | 5589.94 | 0 |
| C122747872_1_2961.0:1-2959    | 2959 | Viruses | gi 82503188 ref NC_007605.1  | 5689.92 | 0 |
| C122766940_1_3166.0:1-3164    | 3164 | Viruses | gi 82503188 ref NC_007605.1  | 6078.3  | 0 |
| C122770662_1_3216.0:1-3214    | 3214 | Viruses | gi 82503188 ref NC_007605.1  | 6180.21 | 0 |
| C122779453_1_3342.0:1-3340    | 3340 | Viruses | gi 82503188 ref NC_007605.1  | 6422.47 | 0 |
| C122807074_1_3934.0:1-3932    | 3932 | Viruses | gi 82503188 ref NC_007605.1  | 7560.7  | 0 |
| C122816684_1_4307.0:1-4305    | 4305 | Viruses | gi 82503188 ref NC_007605.1  | 8264.4  | 0 |
| C122823252_1_4697.0:1-4695    | 4695 | Viruses | gi 82503188 ref NC_007605.1  | 9027.71 | 0 |
| C122832902_1_6215.0:1-6213    | 6213 | Viruses | gi 82503188 ref NC_007605.1  | 11946.3 | 0 |
| C122833702_1_6620.0:1-6618    | 6618 | Viruses | gi 82503188 ref NC_007605.1  | 12725   | 0 |
| C122833934_1_6767.0:1-6765    | 6765 | Viruses | gi 82503188 ref NC_007605.1  | 13007.7 | 0 |
| scaffold168760_1_552.0:1-468  | 468  | Viruses | gi 82503188 ref NC_007605.1  | 888.969 | 0 |
| scaffold25509_1_5582.10:1-717 | 717  | Viruses | gi 9626372 ref NC_001422.1   | 1379.25 | 0 |
| scaffold25509_1_5582.12:1-874 | 874  | Viruses | gi 9626372 ref NC_001422.1   | 1617.67 | 0 |
| scaffold25509_1_5582.15:1-457 | 457  | Viruses | gi 9626372 ref NC_001422.1   | 879.356 | 0 |
| scaffold25509_1_5582.2:1-837  | 837  | Viruses | gi 9626372 ref NC_001422.1   | 1609.98 | 0 |
| C154349094_1_379.0:1-377      | 377  | Viruses | gi 9626158 ref NC_001405.1   | 714.005 | 0 |

|                               |     |          |                              |         |           |
|-------------------------------|-----|----------|------------------------------|---------|-----------|
| scaffold25509_1_5582.11:1-297 | 297 | Viruses  | gi 9626372 ref NC_001422.1   | 571.726 | 1.58E-162 |
| C119074009_1_306.0:1-304      | 304 | Viruses  | gi 82503188 ref NC_007605.1  | 569.803 | 6.16E-162 |
| C118836010_1_281.0:1-279      | 279 | Viruses  | gi 82503188 ref NC_007605.1  | 537.117 | 3.88E-152 |
| C118994787_1_297.0:1-295      | 295 | Viruses  | gi 82503188 ref NC_007605.1  | 537.117 | 4.12E-152 |
| C118747645_1_272.0:1-270      | 270 | Viruses  | gi 139424470 ref NC_009334.1 | 519.813 | 6.06E-147 |
| C118700636_1_268.0:1-266      | 266 | Viruses  | gi 82503188 ref NC_007605.1  | 512.122 | 1.23E-144 |
| scaffold25509_1_5582.6:1-264  | 264 | Viruses  | gi 9626372 ref NC_001422.1   | 490.973 | 2.84E-138 |
| scaffold25509_1_5582.4:1-208  | 208 | Viruses  | gi 9626372 ref NC_001422.1   | 400.606 | 3.49E-111 |
| C117842211_1_203.0:1-201      | 201 | Viruses  | gi 82503188 ref NC_007605.1  | 387.148 | 3.79E-107 |
| C117849537_1_203.0:1-201      | 201 | Viruses  | gi 139424470 ref NC_009334.1 | 387.148 | 3.79E-107 |
| scaffold25509_1_5582.7:1-197  | 197 | Viruses  | gi 9626372 ref NC_001422.1   | 379.457 | 7.65E-105 |
| C117426534_1_182.0:1-180      | 180 | Viruses  | gi 139424470 ref NC_009334.1 | 346.771 | 4.78E-95  |
| scaffold25509_1_5582.16:1-173 | 173 | Viruses  | gi 9626372 ref NC_001422.1   | 333.312 | 5.14E-91  |
| scaffold25509_1_5582.5:1-150  | 150 | Viruses  | gi 9626372 ref NC_001422.1   | 289.091 | 8.97E-78  |
| scaffold25509_1_5582.9:1-142  | 142 | Viruses  | gi 9626372 ref NC_001422.1   | 273.709 | 3.62E-73  |
| C116026170_1_133.0:1-131      | 131 | Viruses  | gi 82503188 ref NC_007605.1  | 252.559 | 7.67E-67  |
| C115756264_1_127.0:1-125      | 125 | Viruses  | gi 82503188 ref NC_007605.1  | 241.023 | 2.16E-63  |
| C115761692_1_127.0:1-125      | 125 | Viruses  | gi 82503188 ref NC_007605.1  | 241.023 | 2.16E-63  |
| scaffold62567_1_922.3:1-125   | 125 | Viruses  | gi 82503188 ref NC_007605.1  | 241.023 | 2.16E-63  |
| scaffold25509_1_5582.14:1-124 | 124 | Viruses  | gi 9626372 ref NC_001422.1   | 239.101 | 8.10E-63  |
| C151024180_1_126.0:1-124      | 124 | Viruses  | gi 9626243 ref NC_001416.1   | 235.255 | 1.16E-61  |
| scaffold62567_1_922.4:1-119   | 119 | Viruses  | gi 82503188 ref NC_007605.1  | 229.487 | 6.04E-60  |
| C154594504_1_424.0:1-422      | 422 | Bacteria | gi 254667448 ref NC_013010.1 | 812.062 | 0         |
| C154645116_1_434.0:1-432      | 432 | Bacteria | gi 209916806 ref NC_011407.1 | 642.865 | 0         |
| C155261927_1_583.0:1-581      | 581 | Bacteria | gi 209921952 ref NC_011419.1 | 1112    | 0         |
| C155828458_1_777.0:1-775      | 775 | Bacteria | gi 152973607 ref NC_009650.1 | 1479.23 | 0         |
| C153974801_1_321.0:1-319      | 319 | Bacteria | gi 253750923 ref NC_012924.1 | 515.968 | 5.42E-144 |
| C153399044_1_253.0:1-251      | 251 | Bacteria | gi 253750923 ref NC_012924.1 | 471.746 | 8.56E-131 |
| C152979378_1_217.0:1-215      | 215 | Bacteria | gi 254667448 ref NC_013010.1 | 396.761 | 2.71E-108 |
| C152733830_1_200.0:1-198      | 198 | Bacteria | gi 254667448 ref NC_013010.1 | 381.38  | 1.05E-103 |
| C152632972_1_193.0:1-191      | 191 | Bacteria | gi 157149504 ref NC_009790.1 | 367.921 | 1.14E-99  |
| C152435528_1_182.0:1-180      | 180 | Bacteria | gi 254667448 ref NC_013010.1 | 346.771 | 2.47E-93  |
| C152451524_1_183.0:1-181      | 181 | Bacteria | gi 254667448 ref NC_013010.1 | 337.158 | 1.95E-90  |
| C152085975_1_164.0:1-162      | 162 | Bacteria | gi 18466424 ref NC_003384.1  | 312.163 | 5.74E-83  |
| C151524210_1_142.0:1-140      | 140 | Bacteria | gi 18466424 ref NC_003384.1  | 269.864 | 2.61E-70  |
| C151497500_1_141.0:1-139      | 139 | Bacteria | gi 152973607 ref NC_009650.1 | 267.941 | 9.82E-70  |
| C151911791_1_156.0:1-154      | 154 | Bacteria | gi 146317663 ref NC_009442.1 | 262.173 | 6.05E-68  |
| C151376510_1_137.0:1-135      | 135 | Bacteria | gi 254667448 ref NC_013010.1 | 260.25  | 1.96E-67  |
| C151136665_1_130.0:1-128      | 128 | Bacteria | gi 254667448 ref NC_013010.1 | 246.791 | 2.07E-63  |
| C151162069_1_130.0:1-128      | 128 | Bacteria | gi 254667448 ref NC_013010.1 | 241.023 | 1.13E-61  |
| C151164119_1_130.0:1-128      | 128 | Bacteria | gi 254667448 ref NC_013010.1 | 235.255 | 6.14E-60  |
| C150834658_1_122.0:1-120      | 120 | Bacteria | gi 254667448 ref NC_013010.1 | 231.41  | 8.16E-59  |
| C150539079_1_115.0:1-113      | 113 | Bacteria | gi 253750923 ref NC_012924.1 | 217.951 | 8.52E-55  |
| C150516123_1_114.0:1-112      | 112 | Bacteria | gi 219682499 ref NC_011835.1 | 216.028 | 3.19E-54  |
| C150634133_1_117.0:1-115      | 115 | Bacteria | gi 254667448 ref NC_013010.1 | 216.028 | 3.30E-54  |
| C150437527_1_113.0:1-111      | 111 | Bacteria | gi 254667448 ref NC_013010.1 | 214.106 | 1.20E-53  |
| C150438245_1_113.0:1-111      | 111 | Bacteria | gi 254667448 ref NC_013010.1 | 214.106 | 1.20E-53  |
| C150340425_1_111.0:1-109      | 109 | Bacteria | gi 254667448 ref NC_013010.1 | 210.26  | 1.68E-52  |

|                              |      |          |                                    |         |           |
|------------------------------|------|----------|------------------------------------|---------|-----------|
| C149877309_1_103.0:1-101     | 101  | Bacteria | gi 253750923 ref NC_012924.1       | 189.111 | 3.55E-46  |
| C152535080_1_187.0:1-185     | 185  | Bacteria | gi 146317663 ref NC_009442.1       | 285.245 | 8.48E-75  |
| C151256372_1_133.0:1-131     | 131  | Bacteria | gi 254667448 ref NC_013010.1       | 244.869 | 8.07E-63  |
| C150829637_1_121.0:1-119     | 119  | Bacteria | gi 157149504 ref NC_009790.1       | 227.565 | 1.16E-57  |
| C153075744_1_225.0:1-223     | 223  | Bacteria | gi 209917191 ref NC_011415.1       | 425.601 | 5.87E-117 |
| C153834674_1_302.0:1-300     | 300  | Bacteria | gi 209921952 ref NC_011419.1       | 558.267 | 9.37E-157 |
| C151702247_1_148.0:1-146     | 146  | Bacteria | gi 18466424 ref NC_003384.1        | 277.554 | 1.33E-72  |
| C151024180_1_126.0:1-124     | 124  | Bacteria | gi 238899406 ref NC_012759.1       | 235.255 | 5.91E-60  |
| C152460830_1_183.0:1-181     | 181  | Bacteria | gi 182433793 ref NC_010572.1       | 173.729 | 3.07E-41  |
| C153118340_1_228.0:1-226     | 226  | Bacteria | gi 209921952 ref NC_011419.1       | 425.601 | 5.95E-117 |
| C153176499_1_233.0:1-231     | 231  | Bacteria | gi 253750923 ref NC_012924.1       | 415.988 | 4.78E-114 |
| C150012630_1_105.0:1-103     | 103  | Bacteria | gi 170679574 ref NC_010498.1       | 192.956 | 2.53E-47  |
| C152090971_1_164.0:1-162     | 162  | Bacteria | gi 209921952 ref NC_011419.1       | 302.549 | 4.49E-80  |
| C152369833_1_178.0:1-176     | 176  | Bacteria | gi 89106884 ref AC_000091.1        | 321.776 | 8.06E-86  |
| C153494416_1_263.0:1-261     | 261  | Bacteria | gi 206575367 ref NC_011281.1       | 292.936 | 6.00E-77  |
| C151132801_1_129.0:1-127     | 127  | Bacteria | gi 253750923 ref NC_012924.1       | 223.719 | 1.81E-56  |
| C150990962_1_126.0:1-124     | 124  | Bacteria | gi 238899406 ref NC_012759.1       | 214.106 | 1.37E-53  |
| C152036216_1_162.0:1-160     | 160  | Bacteria | gi 157149574 ref NC_009791.1       | 237.178 | 2.11E-60  |
| C156518102_1_1159.0:1-1102   | 1102 | Fungi    | gi 160338784 ref NZ_AACM02000411.1 | 1788.79 | 0         |
| C154601314_1_425.0:1-423     | 423  | Fungi    | gi 160338799 ref NZ_AACM02000426.1 | 744.768 | 0         |
| C154321982_1_374.0:1-318     | 318  | Fungi    | gi 160338805 ref NZ_AACM02000432.1 | 606.334 | 1.63E-171 |
| scaffold32896_1_1686.5:1-273 | 273  | Fungi    | gi 160338808 ref NZ_AACM02000435.1 | 469.823 | 1.72E-130 |
| scaffold32896_1_1686.2:1-241 | 241  | Fungi    | gi 160338808 ref NZ_AACM02000435.1 | 464.055 | 8.16E-129 |
| C153540141_1_268.0:1-230     | 230  | Fungi    | gi 160338799 ref NZ_AACM02000426.1 | 402.529 | 2.57E-110 |
| C153492428_1_263.0:34-237    | 204  | Fungi    | gi 160338805 ref NZ_AACM02000432.1 | 381.38  | 5.23E-104 |
| C152632064_1_193.0:1-191     | 191  | Fungi    | gi 160338794 ref NZ_AACM02000421.1 | 367.921 | 5.47E-100 |
| C152529756_1_187.0:1-185     | 185  | Fungi    | gi 160338803 ref NZ_AACM02000430.1 | 344.849 | 4.65E-93  |
| C152392335_1_179.0:1-177     | 177  | Fungi    | gi 160338797 ref NZ_AACM02000424.1 | 341.003 | 6.35E-92  |
| C152336937_1_176.0:1-174     | 174  | Fungi    | gi 160338803 ref NZ_AACM02000430.1 | 335.235 | 3.39E-90  |
| C152085975_1_164.0:1-162     | 162  | Fungi    | gi 221228878 ref NZ_AABX02000085.1 | 312.163 | 2.78E-83  |
| C152749880_1_201.0:53-199    | 147  | Fungi    | gi 160338805 ref NZ_AACM02000432.1 | 283.322 | 1.19E-74  |
| C151718669_1_149.0:1-147     | 147  | Fungi    | gi 160338797 ref NZ_AACM02000424.1 | 277.554 | 6.49E-73  |
| C151503302_1_141.0:1-139     | 139  | Fungi    | gi 160338805 ref NZ_AACM02000432.1 | 267.941 | 4.76E-70  |
| C151364952_1_136.0:1-134     | 134  | Fungi    | gi 160338807 ref NZ_AACM02000434.1 | 258.328 | 3.57E-67  |
| C151164119_1_130.0:1-128     | 128  | Fungi    | gi 121697430 ref NW_001510354.1    | 246.791 | 1.00E-63  |
| C151321645_1_135.0:1-133     | 133  | Fungi    | gi 160338790 ref NZ_AACM02000417.1 | 244.869 | 3.98E-63  |
| scaffold32896_1_1686.0:1-118 | 118  | Fungi    | gi 160338808 ref NZ_AACM02000435.1 | 227.565 | 5.57E-58  |
| C151479640_1_140.0:1-138     | 138  | Fungi    | gi 160338808 ref NZ_AACM02000435.1 | 214.106 | 7.58E-54  |
| C150339437_1_111.0:1-109     | 109  | Fungi    | gi 160338805 ref NZ_AACM02000432.1 | 210.26  | 8.18E-53  |
| C150340425_1_111.0:1-109     | 109  | Fungi    | gi 145606593 ref NW_001798731.1    | 210.26  | 8.18E-53  |
| C150285373_1_110.0:1-108     | 108  | Fungi    | gi 160338797 ref NZ_AACM02000424.1 | 208.338 | 3.06E-52  |
| C150516123_1_114.0:1-112     | 112  | Fungi    | gi 145606593 ref NW_001798731.1    | 200.647 | 6.62E-50  |
| C152460830_1_183.0:1-181     | 181  | Fungi    | gi 115433601 ref XM_001216938.1    | 198.724 | 4.41E-49  |
| C149941624_1_104.0:1-102     | 102  | Fungi    | gi 145606593 ref NW_001798731.1    | 196.802 | 8.46E-49  |
| scaffold39416_1_3596.2:1-506 | 506  | Fungi    | gi 221247333 ref NZ_AAYY01000048.1 | 183.343 | 5.74E-44  |
| C151256372_1_133.0:1-131     | 131  | Fungi    | gi 121697430 ref NW_001510354.1    | 250.637 | 7.18E-65  |
| C151702247_1_148.0:1-146     | 146  | Fungi    | gi 121697430 ref NW_001510354.1    | 277.554 | 6.44E-73  |
| scaffold41546_1_908.0:1-145  | 145  | Fungi    | gi 160338807 ref NZ_AACM02000434.1 | 237.178 | 9.12E-61  |

|                                    |     |       |                                    |         |           |
|------------------------------------|-----|-------|------------------------------------|---------|-----------|
| scaffold6349_1_7434.2:211-717      | 507 | Fungi | gi 221247333 ref NZ_AAYY01000048.1 | 216.028 | 8.33E-54  |
| C151948881_1_158.0:1-156           | 156 | Fungi | gi 155017865 ref NC_005788.3       | 194.879 | 5.38E-48  |
| scaffold60353_1_623.0:100-455      | 356 | Fungi | gi 221247333 ref NZ_AAYY01000048.1 | 196.802 | 3.52E-48  |
| scaffold31885_1_3636.3:1-350       | 350 | Fungi | gi 221247333 ref NZ_AAYY01000048.1 | 216.028 | 5.64E-54  |
| scaffold3678_491179_492217.1:1-207 | 207 | Fungi | gi 145602701 ref NW_001798719.1    | 212.183 | 4.56E-53  |
| scaffold61091_1_2316.1:1-485       | 485 | Fungi | gi 221247333 ref NZ_AAYY01000048.1 | 177.575 | 2.99E-42  |
| scaffold76524_1_4387.4:1-513       | 513 | Fungi | gi 221247333 ref NZ_AAYY01000048.1 | 198.724 | 1.36E-48  |
| C152369833_1_178.0:1-176           | 176 | Fungi | gi 221228837 ref NZ_AABX02000044.1 | 308.317 | 4.36E-82  |
| scaffold31764_1_478.0:1-116        | 116 | Fungi | gi 160338807 ref NZ_AACM02000434.1 | 202.57  | 1.83E-50  |
| scaffold11464_1_800.1:1-627        | 627 | Fungi | gi 221247333 ref NZ_AAYY01000048.1 | 204.492 | 3.09E-50  |
| scaffold34194_1_9437.2:1-566       | 566 | Fungi | gi 221247333 ref NZ_AAYY01000048.1 | 221.796 | 1.71E-55  |
| scaffold42760_1_2579.2:1-331       | 331 | Fungi | gi 221247333 ref NZ_AAYY01000048.1 | 187.188 | 2.55E-45  |
| scaffold19674_1_351.0:1-349        | 349 | Fungi | gi 221247333 ref NZ_AAYY01000048.1 | 194.879 | 1.31E-47  |
| C151524210_1_142.0:1-140           | 140 | Fungi | gi 121697430 ref NW_001510354.1    | 239.101 | 2.31E-61  |
| scaffold21232_1_21043.3:1-533      | 533 | Fungi | gi 221247333 ref NZ_AAYY01000048.1 | 175.652 | 1.25E-41  |
| scaffold19121_1_9786.2:1-445       | 445 | Fungi | gi 221247333 ref NZ_AAYY01000048.1 | 210.26  | 3.96E-52  |
| scaffold27701_1_2435.2:1-385       | 385 | Fungi | gi 221247333 ref NZ_AAYY01000048.1 | 183.343 | 4.31E-44  |
| scaffold42760_1_2579.1:1-276       | 276 | Fungi | gi 221247333 ref NZ_AAYY01000048.1 | 175.652 | 6.23E-42  |
| scaffold40930_1_1010.1:1-261       | 261 | Fungi | gi 160338807 ref NZ_AACM02000434.1 | 385.225 | 4.79E-105 |
| scaffold8637_1_20241.10:1-597      | 597 | Fungi | gi 221247333 ref NZ_AAYY01000048.1 | 173.729 | 5.34E-41  |
| scaffold6349_1_7434.4:1-816        | 816 | Fungi | gi 221247333 ref NZ_AAYY01000048.1 | 202.57  | 1.54E-49  |
| scaffold31075_1_3643.1:54-990      | 937 | Fungi | gi 221247333 ref NZ_AAYY01000048.1 | 242.946 | 1.24E-61  |
| scaffold21232_1_21043.19:1-649     | 649 | Fungi | gi 221247333 ref NZ_AAYY01000048.1 | 260.25  | 5.25E-67  |



**Supplementary Data Set 3. Microbial sequences identified among the 'no-hit' contigs from *Wheeler et al.*** We aligned the complete set of 'no hit' contigs against viral, bacterial, and fungal databases by MegaBlast. The most significant alignments are reported.

| Query name   | Query length | BLAST Database | Hit ID                          | Bit score | E-value  |
|--------------|--------------|----------------|---------------------------------|-----------|----------|
| Contig142158 | 206          | Viruses        | gi 118496614 ref NC_008603.1    | 362.153   | 1.30E-99 |
| Contig5230   | 196          | Bacteria       | gi 163854304 ref NC_010170.1    | 279.477   | 4.93E-73 |
| Contig9647   | 203          | Bacteria       | gi 50841496 ref NC_006085.1     | 362.153   | 6.65E-98 |
| Contig94873  | 187          | Bacteria       | gi 222093774 ref NC_011969.1    | 262.173   | 7.57E-68 |
| Contig144673 | 182          | Bacteria       | gi 255534169 ref NC_013062.1    | 183.343   | 3.94E-44 |
| Contig147766 | 105          | Bacteria       | gi 172062142 ref NC_010552.1    | 100.667   | 1.57E-19 |
| Contig149702 | 190          | Bacteria       | gi 194363778 ref NC_011071.1    | 244.869   | 1.25E-62 |
| Contig63162  | 245          | Fungi          | gi 145616316 ref NW_001798830.1 | 187.188   | 1.84E-45 |
| Contig125249 | 201          | Fungi          | gi 145616316 ref NW_001798830.1 | 175.652   | 4.38E-42 |
| Contig75100  | 192          | Fungi          | gi 145616316 ref NW_001798830.1 | 179.497   | 2.89E-43 |
| Contig162560 | 274          | Fungi          | gi 145616316 ref NW_001798830.1 | 225.642   | 5.52E-57 |
| Contig136490 | 270          | Fungi          | gi 145616316 ref NW_001798830.1 | 204.492   | 1.26E-50 |
| Contig857    | 248          | Fungi          | gi 145601699 ref NW_001798706.1 | 214.106   | 1.47E-53 |
| Contig81457  | 236          | Fungi          | gi 145616316 ref NW_001798830.1 | 229.487   | 3.26E-58 |
| Contig98682  | 211          | Fungi          | gi 145616316 ref NW_001798830.1 | 210.26    | 1.77E-52 |
| Contig168296 | 175          | Fungi          | gi 145616316 ref NW_001798830.1 | 187.188   | 1.26E-45 |
| Contig15975  | 194          | Fungi          | gi 145615709 ref NW_001798760.1 | 225.642   | 3.76E-57 |
| Contig108148 | 177          | Fungi          | gi 145616316 ref NW_001798830.1 | 214.106   | 1.01E-53 |
| Contig71361  | 243          | Fungi          | gi 145616316 ref NW_001798830.1 | 200.647   | 1.62E-49 |
| Contig98900  | 202          | Fungi          | gi 145616316 ref NW_001798830.1 | 177.575   | 1.16E-42 |
| Contig49443  | 207          | Fungi          | gi 145616319 ref NW_001798834.1 | 187.188   | 1.52E-45 |
| Contig78945  | 210          | Fungi          | gi 145616316 ref NW_001798830.1 | 183.343   | 2.23E-44 |
| Contig3736   | 243          | Fungi          | gi 145616316 ref NW_001798830.1 | 262.173   | 4.88E-68 |
| Contig8215   | 247          | Fungi          | gi 145616316 ref NW_001798830.1 | 235.255   | 6.29E-60 |
| Contig93429  | 203          | Fungi          | gi 145616316 ref NW_001798830.1 | 191.033   | 1.04E-46 |
| Contig106445 | 149          | Fungi          | gi 145616316 ref NW_001798830.1 | 173.729   | 1.19E-41 |
| Contig45474  | 256          | Fungi          | gi 145616316 ref NW_001798830.1 | 194.879   | 9.34E-48 |
| Contig96785  | 277          | Fungi          | gi 145615707 ref XM_001414736.1 | 325.622   | 4.47E-87 |
| Contig125439 | 191          | Fungi          | gi 145616316 ref NW_001798830.1 | 179.497   | 2.88E-43 |
| Contig122859 | 193          | Fungi          | gi 145616316 ref NW_001798830.1 | 196.802   | 1.80E-48 |
| Contig11322  | 194          | Fungi          | gi 145616316 ref NW_001798830.1 | 208.338   | 6.09E-52 |
| Contig40437  | 195          | Fungi          | gi 145616316 ref NW_001798830.1 | 214.106   | 1.12E-53 |
| Contig91838  | 197          | Fungi          | gi 145616316 ref NW_001798830.1 | 177.575   | 1.13E-42 |
| Contig120141 | 198          | Fungi          | gi 145616316 ref NW_001798830.1 | 214.106   | 1.14E-53 |
| Contig90170  | 206          | Fungi          | gi 145616316 ref NW_001798830.1 | 229.487   | 2.80E-58 |
| Contig78748  | 206          | Fungi          | gi 145601699 ref NW_001798706.1 | 196.802   | 1.94E-48 |
| Contig16738  | 208          | Fungi          | gi 145616316 ref NW_001798830.1 | 246.791   | 1.75E-63 |
| Contig25077  | 208          | Fungi          | gi 145616316 ref NW_001798830.1 | 223.719   | 1.54E-56 |
| Contig85093  | 208          | Fungi          | gi 145601699 ref NW_001798706.1 | 175.652   | 4.55E-42 |
| Contig90475  | 209          | Fungi          | gi 145616316 ref NW_001798830.1 | 200.647   | 1.37E-49 |
| Contig90120  | 210          | Fungi          | gi 145616316 ref NW_001798830.1 | 206.415   | 2.53E-51 |
